# Supplementary material for: Thoracoabdominal asynchrony: Two methods in healthy, COPD, and interstitial lung disease patients
Source: PubMed Central journal article supplement (PMC5540557; doi:10.1371/journal.pone.0182417), 2017-08-02
Supplement: pone.0182417.s001.pdf [file pone.0182417.s001.pdf]

**S1 Table.** Borg Scale score applied at the beginning and at the end of each phase of the protocol.

| Groups                | Borg     | Dyspnea   |             | Legs      |             |
|-----------------------|----------|-----------|-------------|-----------|-------------|
|                       |          | Initial   | End         | Initial   | End         |
| <b>Healthy (n=9)</b>  | 1° phase | 0 (0-0)   | 2,7 (0,5-5) | 0 (0-0)   | 3,3 (0,5-7) |
|                       | 2° phase | 0,7 (0-3) | 3,8 (1-8)   | 0,8 (0-3) | 3,8 (0,5-7) |
| <b>ILD<br/>(n=9)</b>  | 1° phase | 0,7 (0-2) | 3,7 (0-9)   | 1,2 (0-5) | 4,3 (0-9)   |
|                       | 2° phase | 1,3 (0-4) | 4 (0,5-10)  | 1,9 (0-6) | 4,7 (0-10)  |
| <b>COPD<br/>(n=9)</b> | 1° phase | 0,5 (0-2) | 3 (0,5-5)   | 0,7 (0-2) | 3 (0,5-5)   |
|                       | 2° phase | 0,4 (0-1) | 3,2 (0,5-5) | 0,4 (0-1) | 3 (0,5-5)   |

**ILD: interstitial lung disease, COPD: chronic obstructive pulmonary disease. Data presented as mean (max-min).**
